# Supplementary material for: Desialylation of O-glycans on glycoprotein Ibα drives receptor signaling and platelet clearance
Source: PubMed Central journal article supplement — Haematologica. 2020 Jan 23;106(1):220–9. doi: 10.3324/haematol.2019.240440 (PMC7776245; doi:10.3324/haematol.2019.240440), 2020-01-23
Supplement: 2019_240440-Disclosures_Contributions.pdf [file 2019_240440-Disclosures_Contributions.pdf]

Haematologica  
HAEMATOL/2019/240440  
Version 3

Desialylation of O-glycans on glycoprotein Iba drives receptor signaling  
and platelet clearance

Yingchun Wang, Wenchun Chen, Wei Zhang, Melissa M. Lee-Sundlov,  
Caterina Casari, Michael C. Berndt, Francois Lanza, Wolfgang  
Bergmeier, Karin M. Hoffmeister, X. Frank Zhang, and Renhao Li

Disclosures: 1. This work was supported in part by NIH grants HL082808, HL123984 (RL, XFZ) and HL144976 (WB). 2. The authors declare no competing financial interests. 3. None

Contributions: YW, WC, MML-S, CC, WB, KMH designed, performed research, analyzed results, prepared figures and edited the manuscript; WZ performed research and analyzed results; MCB and FL provided critical reagents; XFZ, RL designed research, analyzed results, prepared figures and wrote the paper.
